# Supplementary material for: Computer-Assisted Avatar-Based Treatment for Dysfunctional Beliefs in Depressive Inpatients: A Pilot Study
Source: Frontiers journal article supplement (doi:10.3389/fpsyt.2021.608997), 2021-07-15
Supplement: Data_Sheet_1.pdf [file Data_Sheet_1.pdf]

## Appendix A

Table A.1

*Data represent mean  $\pm$  SD (standard deviation). Age, Age of Onset, Depressive episodes, Duration of index episode, Weeks since Admission, Days until Follow-Up and Scores Reached in the Pretreatment Measurements*

|                                              | CAT-DB+TAU |           | TAU      |           | <i>t</i> | <i>df</i> | <i>p</i> |
|----------------------------------------------|------------|-----------|----------|-----------|----------|-----------|----------|
|                                              | <i>M</i>   | <i>SD</i> | <i>M</i> | <i>SD</i> |          |           |          |
| Age, years                                   | 34.83      | 11.83     | 38.38    | 13.70     | 0.809    | 32        | .425     |
| Age of onset, years                          | 23.27      | 13.46     | 27.08    | 13.50     | 0.745    | 26        | .463     |
| Depressive episodes, n                       | 6.41       | 7.92      | 2.75     | 0.88      | -1.291   | 18        | .213     |
| Duration of index episode, days              | 19.67      | 16.71     | 18.28    | 10.86     | 0.268    | 29        | .791     |
| Time since admission, weeks                  | 4.67       | 3.00      | 3.75     | 2.39      | -0.976   | 32        | .336     |
| Time until follow-up, days                   | 15.83      | 3.46      | 15,5     | 2.48      | -0.319   | 32        | .752     |
| BDI-II score                                 | 30.67      | 8.39      | 30.06    | 7.72      | -0.218   | 32        | .829     |
| Conviction ratings for dysfunctional beliefs | 81.74      | 14.77     | 82,73    | 10.22     | -0.224   | 32        | .824     |
| Conviction ratings for alternative beliefs   | 45.54      | 30.24     | 57,81    | 17.02     | 1.433    | 32        | .161     |

*Note.* BDI-II score = score reached in the German version of the Beck Depression Inventory-II. Conviction ratings for dysfunctional beliefs = mean score of the conviction ratings given for each of the participant's three dysfunctional beliefs. Conviction ratings for alternative beliefs = mean score of the conviction ratings given for each of the participant's three alternative beliefs.

## Appendix B

In this Appendix we report all analyses without removing any outlier.

For the conviction ratings for the dysfunctional beliefs the  $2 \times 3$  repeated-measures ANOVA with the between-subjects factor group (CAT-DB+TAU group, TAU group) and the within-subjects factor session (pretreatment, posttreatment, follow-up) revealed a significant effect for Session,  $F(1.706, 54.597) = 22.772, p < .001, \eta^2 = .416$ . No significant effects were found for the Group  $\times$  Session interaction,  $F(1.706, 54.597) = 1.411, p = .252, \eta^2 = .042$  and for Group,  $F(1, 32) = 1.246, p = .273, \eta^2 = .037$ .

For the conviction ratings of the functional beliefs the ANOVA revealed significant effects for Session,  $F(1.662, 53.187) = 8.621, p = .001, \eta^2 = .21$  and for the Group  $\times$  Session interaction,  $F(1.662, 53.187) = 3.364, p = .050, \eta^2 = .095$ . There was no significant effect for Group,  $F(1, 32) = .315, p = .579, \eta^2 = .010$ .

For the symptom severity the ANOVA revealed a significant effect for Session,  $F(1.894, 60.612) = 16.25, p < .001, \eta^2 = .337$ . No significant effects were found for the Group  $\times$  Session interaction,  $F(1.894, 60.612) = 1.254, p = .291, \eta^2 = .038$  and for Group,  $F(1, 32) = .302, p = .587, \eta^2 = .009$ .

Table B.1

*Means of dependent variables at pretreatment and posttreatment by group*

|                                                | Pretreatment |           | Posttreatment |           | <i>t</i> | <i>df</i> | <i>p</i> |
|------------------------------------------------|--------------|-----------|---------------|-----------|----------|-----------|----------|
|                                                | <i>M</i>     | <i>SD</i> | <i>M</i>      | <i>SD</i> |          |           |          |
| Conviction ratings for dysfunctional beliefs   |              |           |               |           |          |           |          |
| CAT-DB+TAU                                     | 81.74        | 14.77     | 62.11         | 25.13     | 3.539    | 17        | .003     |
| TAU                                            | 82.73        | 10.22     | 71.45         | 21.86     | 2.528    | 15        | .001     |
| Conviction ratings for functional beliefs      |              |           |               |           |          |           |          |
| CAT-DB+TAU                                     | 45.53        | 30.24     | 57.70         | 30.23     | -3.233   | 17        | .005     |
| TAU                                            | 57.81        | 17.01     | 58.87         | 24.42     | -0.276   | 15        | .787     |
| Symptom Severity: Beck Depression Inventory-II |              |           |               |           |          |           |          |
| CAT-DB+TAU                                     | 30.67        | 8.39      | 24.33         | 11.14     | 3.617    | 17        | .002     |
| TAU                                            | 30.06        | 7.71      | 27.5          | 9.76      | 1.275    | 15        | .222     |

Table B.2

*Means of dependent variables at pretreatment and follow-up by group*

|                                                | Pretreatment |           | Follow-Up |           | <i>t</i> | <i>df</i> | <i>p</i> |
|------------------------------------------------|--------------|-----------|-----------|-----------|----------|-----------|----------|
|                                                | <i>M</i>     | <i>SD</i> | <i>M</i>  | <i>SD</i> |          |           |          |
| Conviction ratings for dysfunctional beliefs   |              |           |           |           |          |           |          |
| CAT-DB+TAU                                     | 81.74        | 14.77     | 57.57     | 25.61     | 5.661    | 17        | <.001    |
| TAU                                            | 82.73        | 10.22     | 67.85     | 21.14     | 3.964    | 15        | .001     |
| Conviction ratings for functional beliefs      |              |           |           |           |          |           |          |
| CAT-DB+TAU                                     | 45.53        | 30.24     | 61.98     | 26.52     | -3.828   | 17        | .001     |
| TAU                                            | 57.81        | 17.01     | 62.40     | 19.89     | -1.159   | 15        | .265     |
| Symptom Severity: Beck Depression Inventory-II |              |           |           |           |          |           |          |
| CAT-DB+TAU                                     | 30.67        | 8.39      | 22.28     | 10.24     | 5.343    | 17        | <.001    |
| TAU                                            | 30.06        | 7.71      | 24.5      | 8.63      | 2.652    | 15        | .018     |

Table B.3

*Means of differences of dependent variables between sessions by group*

|                                                | TAU      |           | CAT-DB+TAU |           |          |           |          |
|------------------------------------------------|----------|-----------|------------|-----------|----------|-----------|----------|
|                                                | <i>M</i> | <i>SD</i> | <i>M</i>   | <i>SD</i> | <i>t</i> | <i>df</i> | <i>p</i> |
| Conviction ratings for dysfunctional beliefs   |          |           |            |           |          |           |          |
| Pretreatment –<br>Posttreatment                | 11.25    | 17.80     | 19.63      | 23.53     | -1.159   | 32        | .255     |
| Pretreatment –<br>Follow-Up                    | 14.88    | 23.53     | 24.18      | 18.12     | -1.619   | 32        | .115     |
| Conviction ratings for functional beliefs      |          |           |            |           |          |           |          |
| Pretreatment –<br>Posttreatment                | -1.06    | 15.42     | -12.17     | 15.96     | 2.057    | 32        | .048     |
| Pretreatment –<br>Follow-Up                    | -4.58    | 15.82     | -16.44     | 18.22     | 2.014    | 32        | .052     |
| Symptom Severity: Beck Depression Inventory-II |          |           |            |           |          |           |          |
| Pretreatment –<br>Posttreatment                | 2.56     | 8.04      | 6.33       | 7.43      | -1.421   | 32        | .165     |
| Pretreatment –<br>Follow-Up                    | 5.56     | 8.39      | 8.39       | 6.66      | -1.094   | 32        | .282     |

Table B.4

*Frequencies and percentages of patients with adverse treatment responses in terms of increased conviction ratings for dysfunctional beliefs and BDI-II score between sessions by group*

|                                                | TAU (n = 16) |       | CAT-DB+TAU (n = 18) |       |
|------------------------------------------------|--------------|-------|---------------------|-------|
|                                                | <i>n</i>     | %     | <i>n</i>            | %     |
| Conviction ratings for dysfunctional beliefs   |              |       |                     |       |
| Pretreatment –<br>Posttreatment                | 2            | 12.50 | 3                   | 16.67 |
| Pretreatment –<br>Follow-Up                    | 2            | 12.50 | 2                   | 11.11 |
| Symptom Severity: Beck Depression Inventory-II |              |       |                     |       |
| Pretreatment –<br>Posttreatment                | 4            | 25.00 | 5                   | 27.78 |
| Pretreatment –<br>Follow-Up                    | 4            | 25.00 | 3                   | 16.67 |
